# Supplementary material for: Optimizing Osteogenic Differentiation of Ovine Adipose-Derived Stem Cells by Osteogenic Induction Medium and FGFb, BMP2, or NELL1 In Vitro
Source: Hindawi journal article supplement (doi:10.1155/2018/9781393), 2018-09-26
Supplement: f1 [file 9781393.f1.pdf]

**Supplementary materials**

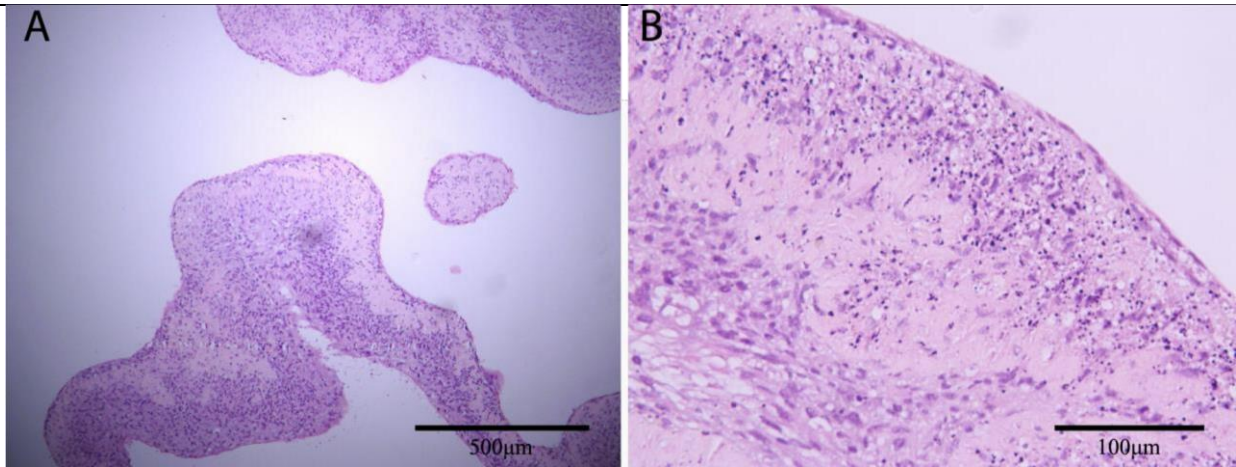

Figure 5: Hematoxylin and Eosin (H&E) staining of a cell sheet after 14 days of growth. A. shows cell layer in 10X magnitude. B. shows cell layer in 40X. Cells are seen in many layers of the sheet with surrounding extra cellular matrix.
